# Supplementary material for: Unveiling Viruses Associated with Gastroenteritis Using a Metagenomics Approach
Source: MDPI journal article supplement (doi:10.3390/v12121432), 2020-12-13

**Supplementary material 1.** Metagenomic sequencing summary statistics obtained with genome detective.

| Sample | Initial paired end reads | Removed reads after quality (percentage) | Used reads | Non-viral reads (percentage) | reads used for assembly | Mapped reads into contigs |
|--------|--------------------------|------------------------------------------|------------|------------------------------|-------------------------|---------------------------|
| F<1    | 6,095,990                | 468,766 (7%)                             | 5,627,224  | 2,867,732 (50%)              | 2,759,492               | 2,364,300                 |
| F1-3A  | 5,613,532                | 220,524 (3%)                             | 5,393,008  | 4,161,306 (77%)              | 1,231,702               | 487,708                   |
| F3-10  | 9,237,546                | 513,822 (5%)                             | 8,723,724  | 1,049,524 (12%)              | 7,674,200               | 7,463,778                 |
| F>10   | 12,265,116               | 655,736 (5%)                             | 11,609,380 | 4036,566 (34%)               | 7,572,814               | 7,414,041                 |
| S<1A   | 1,982,130                | 119,564 (6%)                             | 1,862,566  | 1,049,222 (56%)              | 813,344                 | 873,829                   |
| S<1B   | 1,258,278                | 69,804(5%)                               | 1,188,474  | 850,264 (71%)                | 338,210                 | 199,647                   |
| S1-3A  | 1,549,150                | 60,662 (3%)                              | 1,488,488  | 819,480 (55%)                | 669,008                 | 514,749                   |
| S1-3B  | 1,037,992                | 41,840 (4%)                              | 996,152    | 725,326 (72%)                | 270,826                 | 85,046                    |
| S1-3C  | 881,740                  | 37,730 (4%)                              | 844,010    | 379,784 (44%)                | 464,226                 | 17,425                    |
| S3-10  | 2,419,026                | 70,822 (2%)                              | 2,348,204  | 1,387,786 (59%)              | 960,418                 | 578,919                   |

**Supplementary material 3.** Phylogenetic trees of sapovirus contigs. Trees were constructed by using tree view software within Geneious (software version 11.0 (<https://www.geneious.com>) maximum-likelihood (Tamura-Nei model, Bootstrap of 1,000 replicates) analysis. Phylogenetic trees with the full sapovirus types (a), full length VP1 (b), complete genomes are presented. The labels on the branch indicate the number of substitutions per site.

**a.**

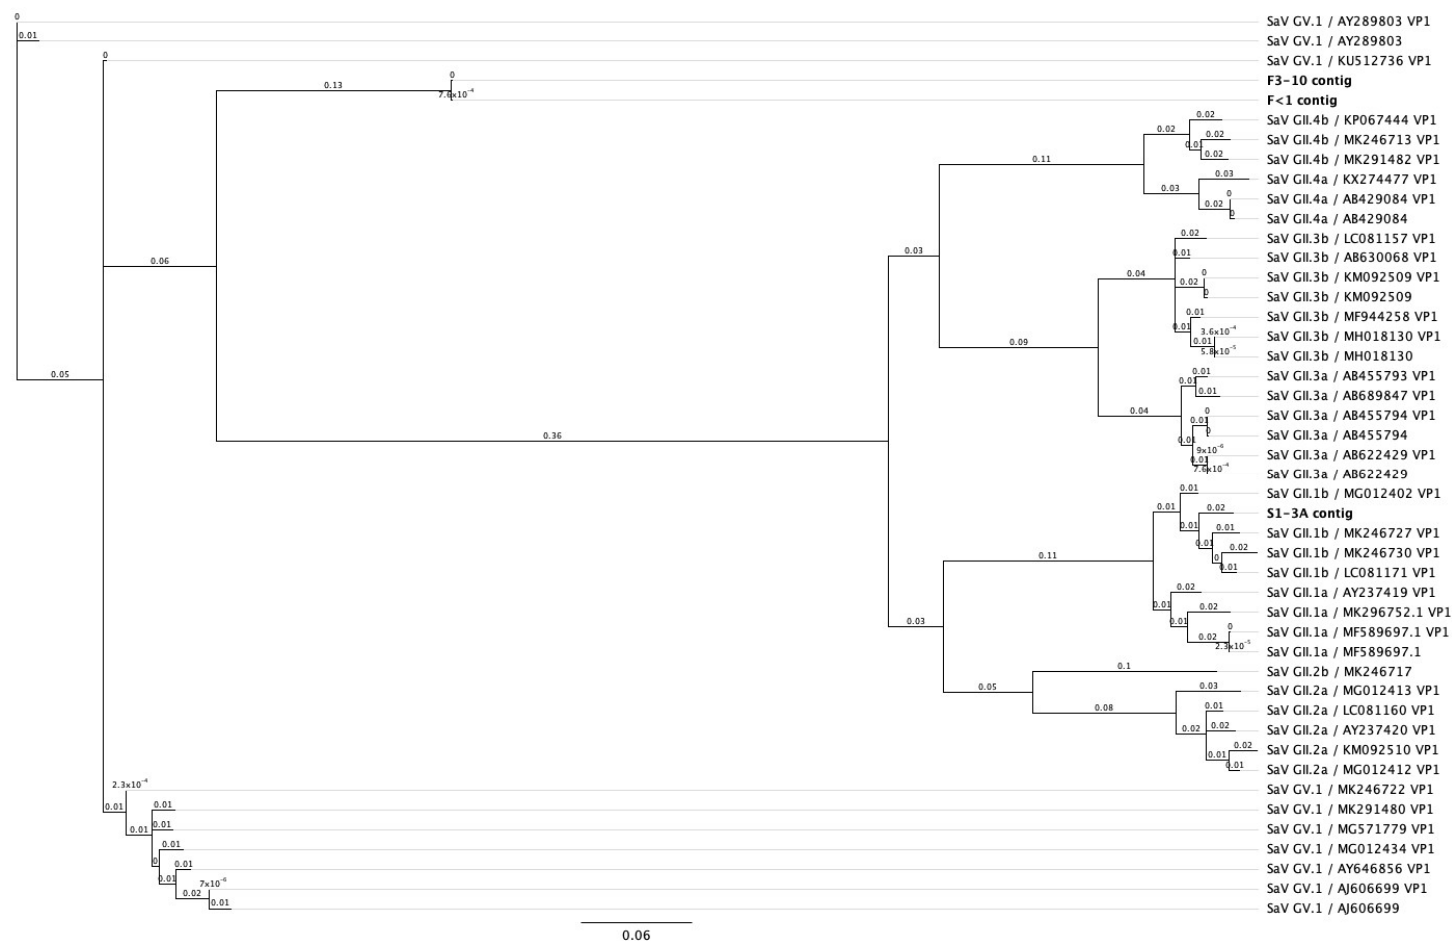

b.

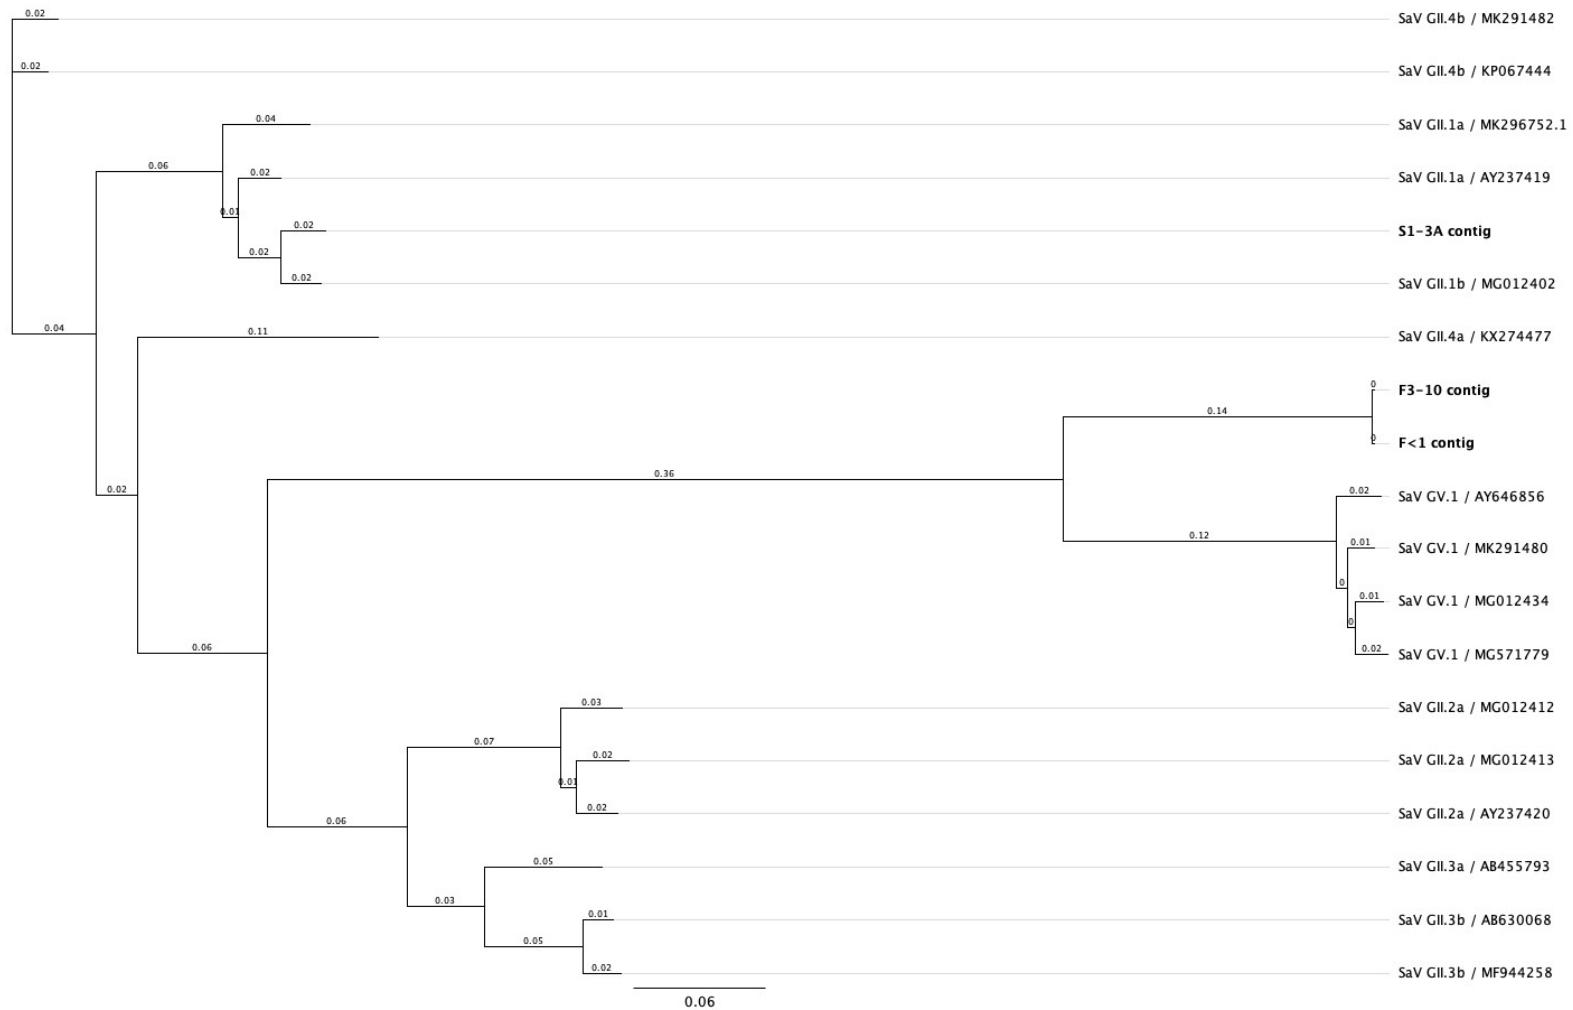

**Supplementary material 4.** Phylogenetic trees of mamastrovirus contigs. Trees were constructed by using tree view software within Geneious (software version 11.0 (<https://www.geneious.com>) maximum-likelihood (Tamura-Nei model, Bootstrap of 1,000 replicates) analysis. Phylogenetic trees with the full mamastrovirus types (a), full length ORF2 (b), complete genomes are presented. The labels on the branch indicate the number of substitutions per site.

**a.**

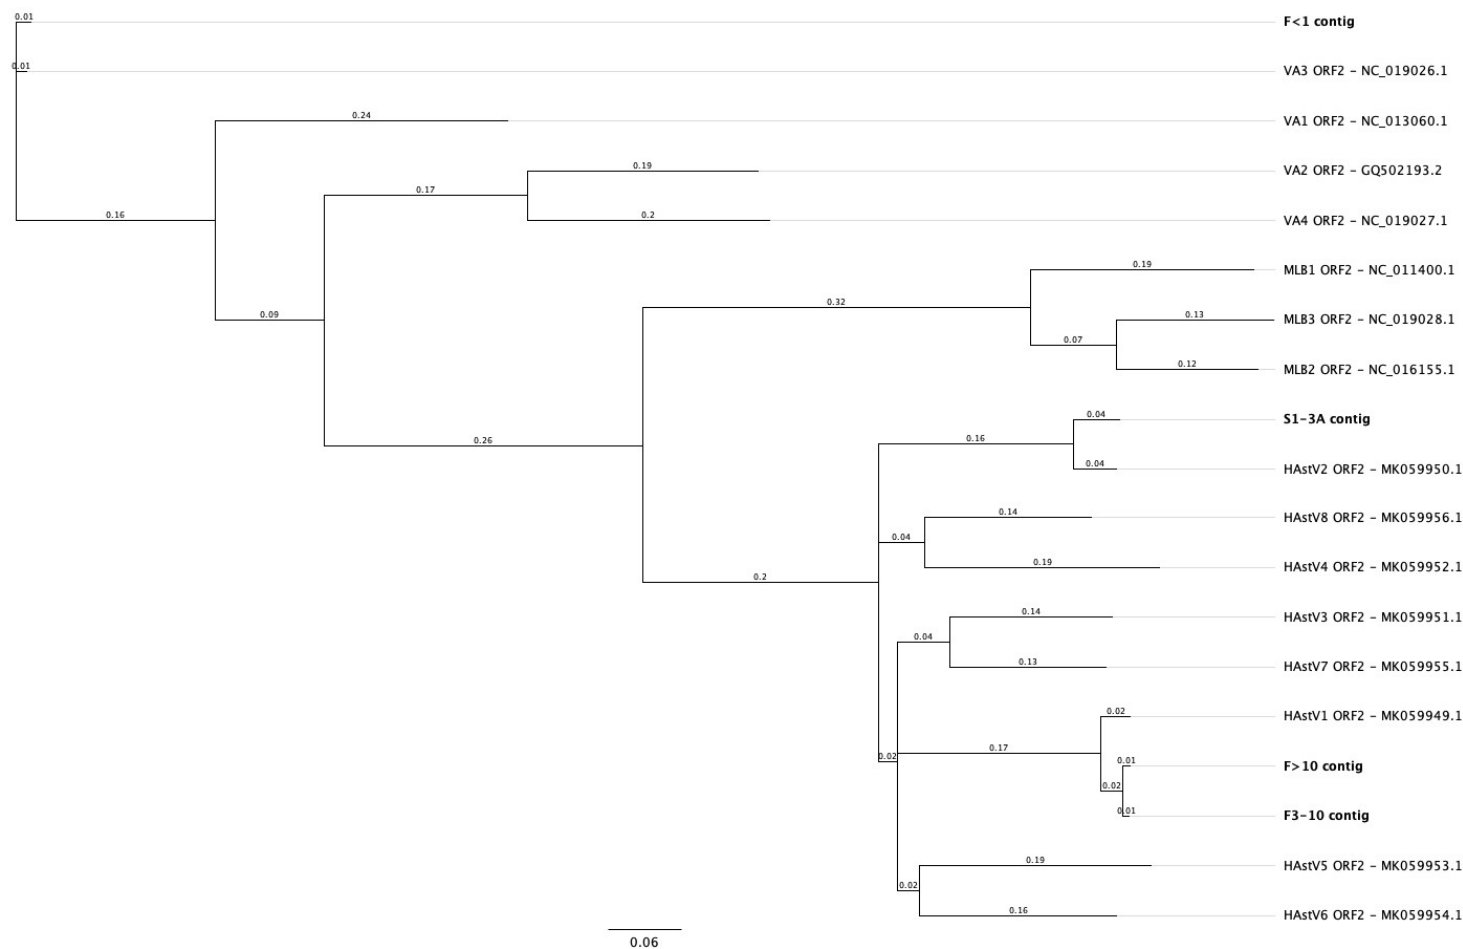

b.

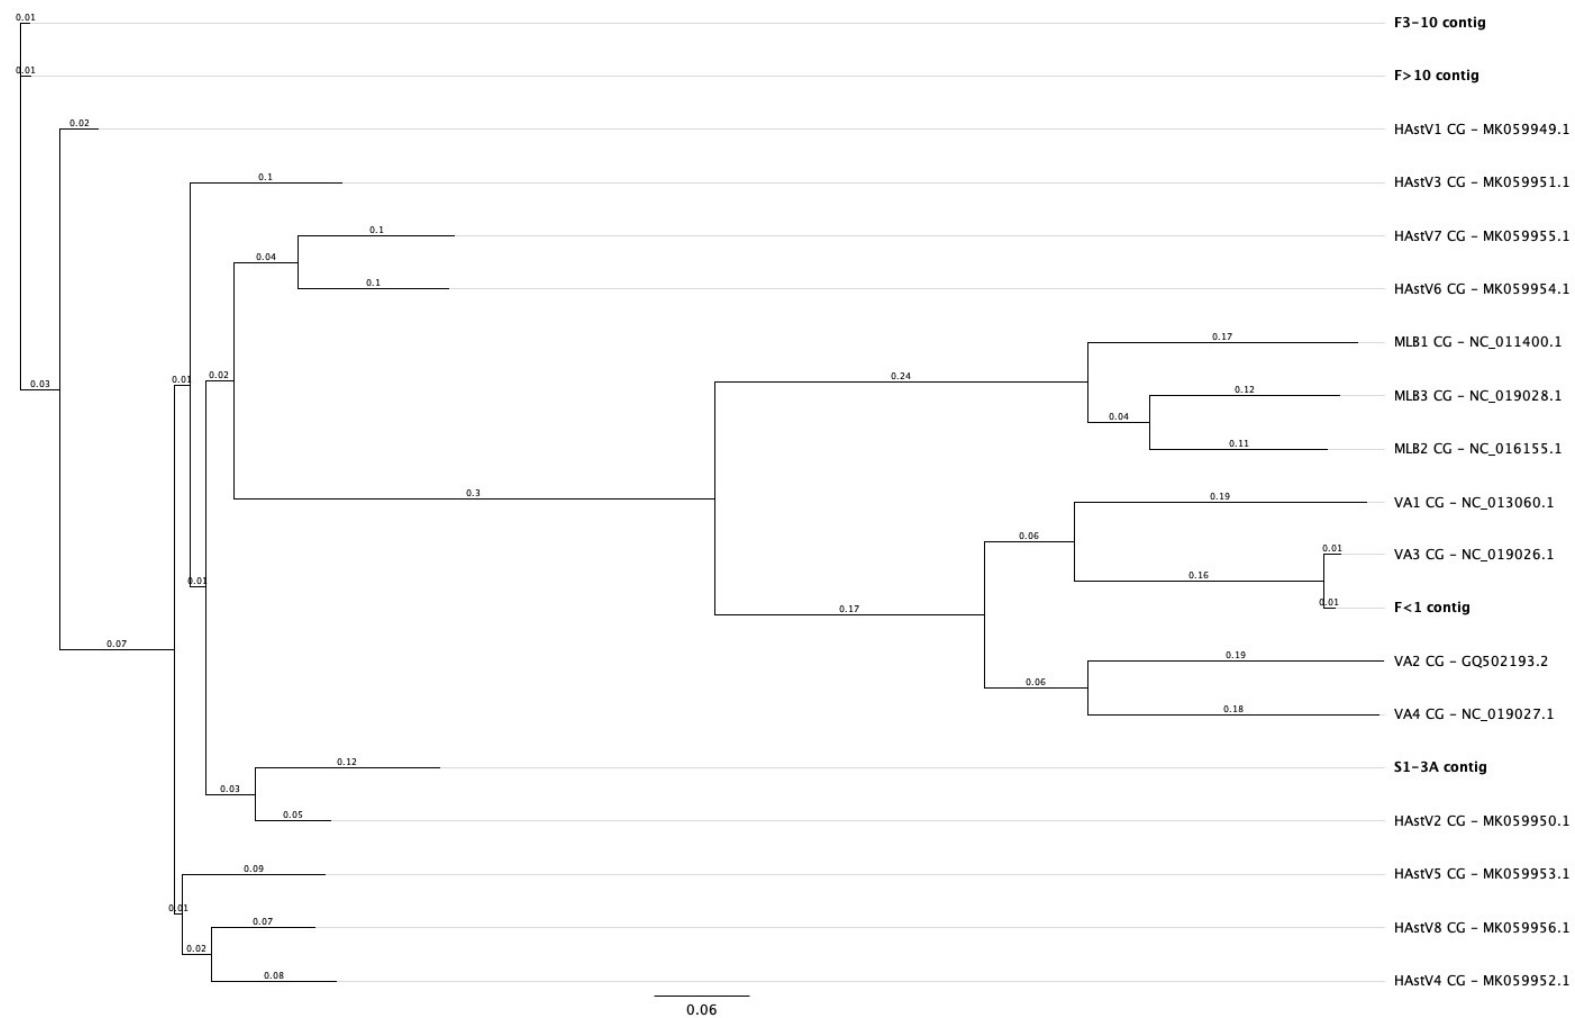

## Supplementary material 5

Accession numbers of reference adenovirus types were retrieved from the Human Adenovirus Working Group (<http://hadvwg.gmu.edu/>). Full adenovirus genomes or the annotated regions corresponding to the hexon, penton and fiber were extracted and aligned with MUSCLE. Phylogenetic tree were constructed by using tree view software within Geneious (software version 11.0 (<https://www.geneious.com>) maximum-likelihood (Tamura-Nei model, Bootstrap of 1,000 replicates) analysis. Phylogenetic trees with the full adenovirus reference types (a), using the hexon (b), penton (c) and fiber (d) are presented. The labels on the branch indicate the number of substitutions per site.

a)

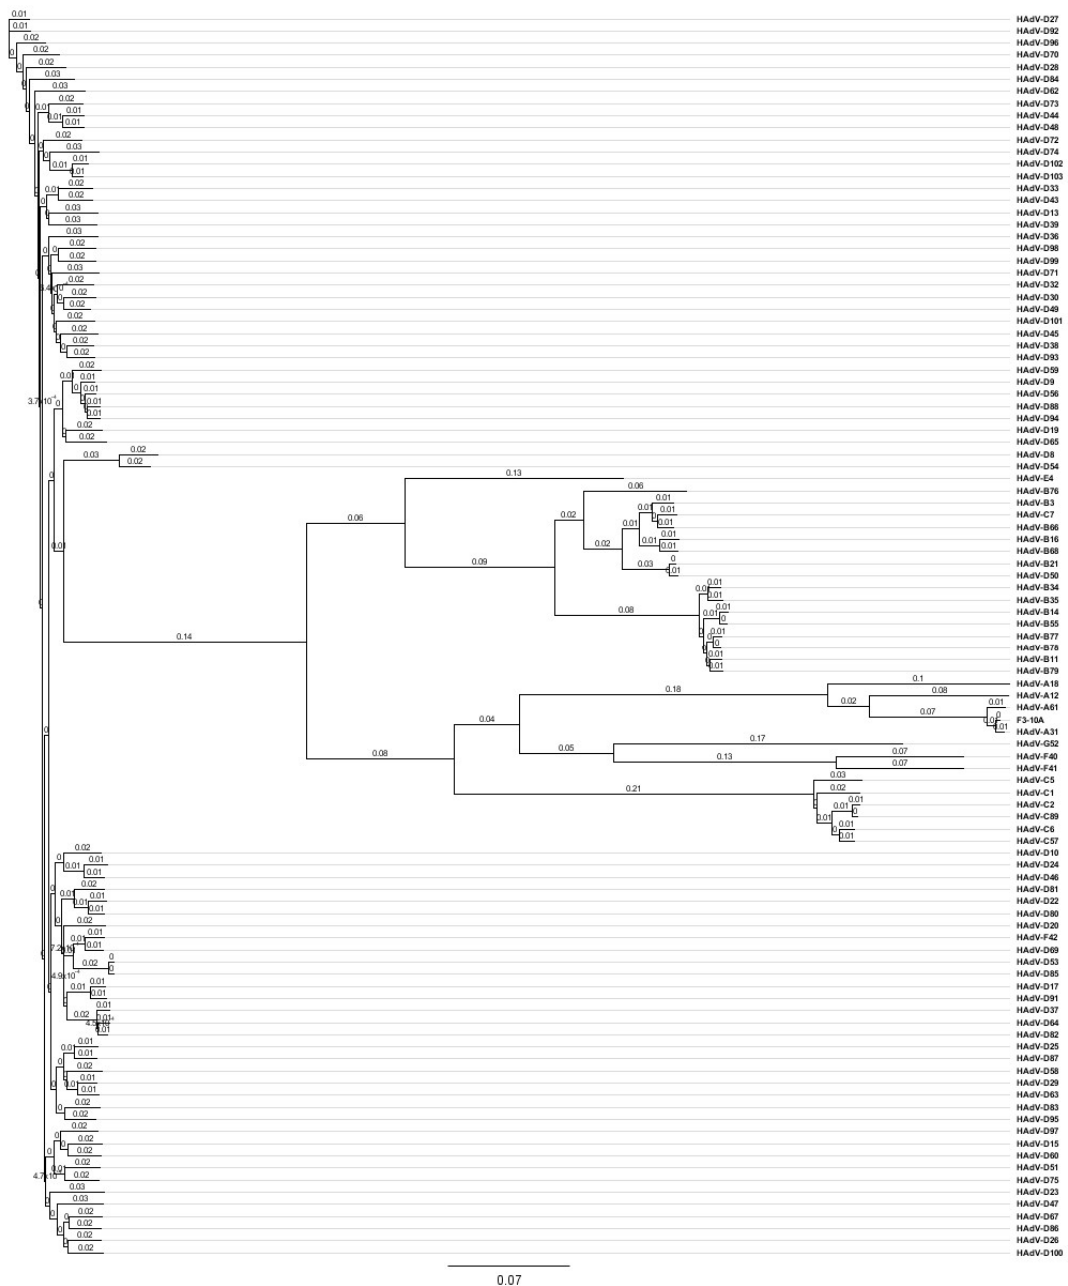

b)

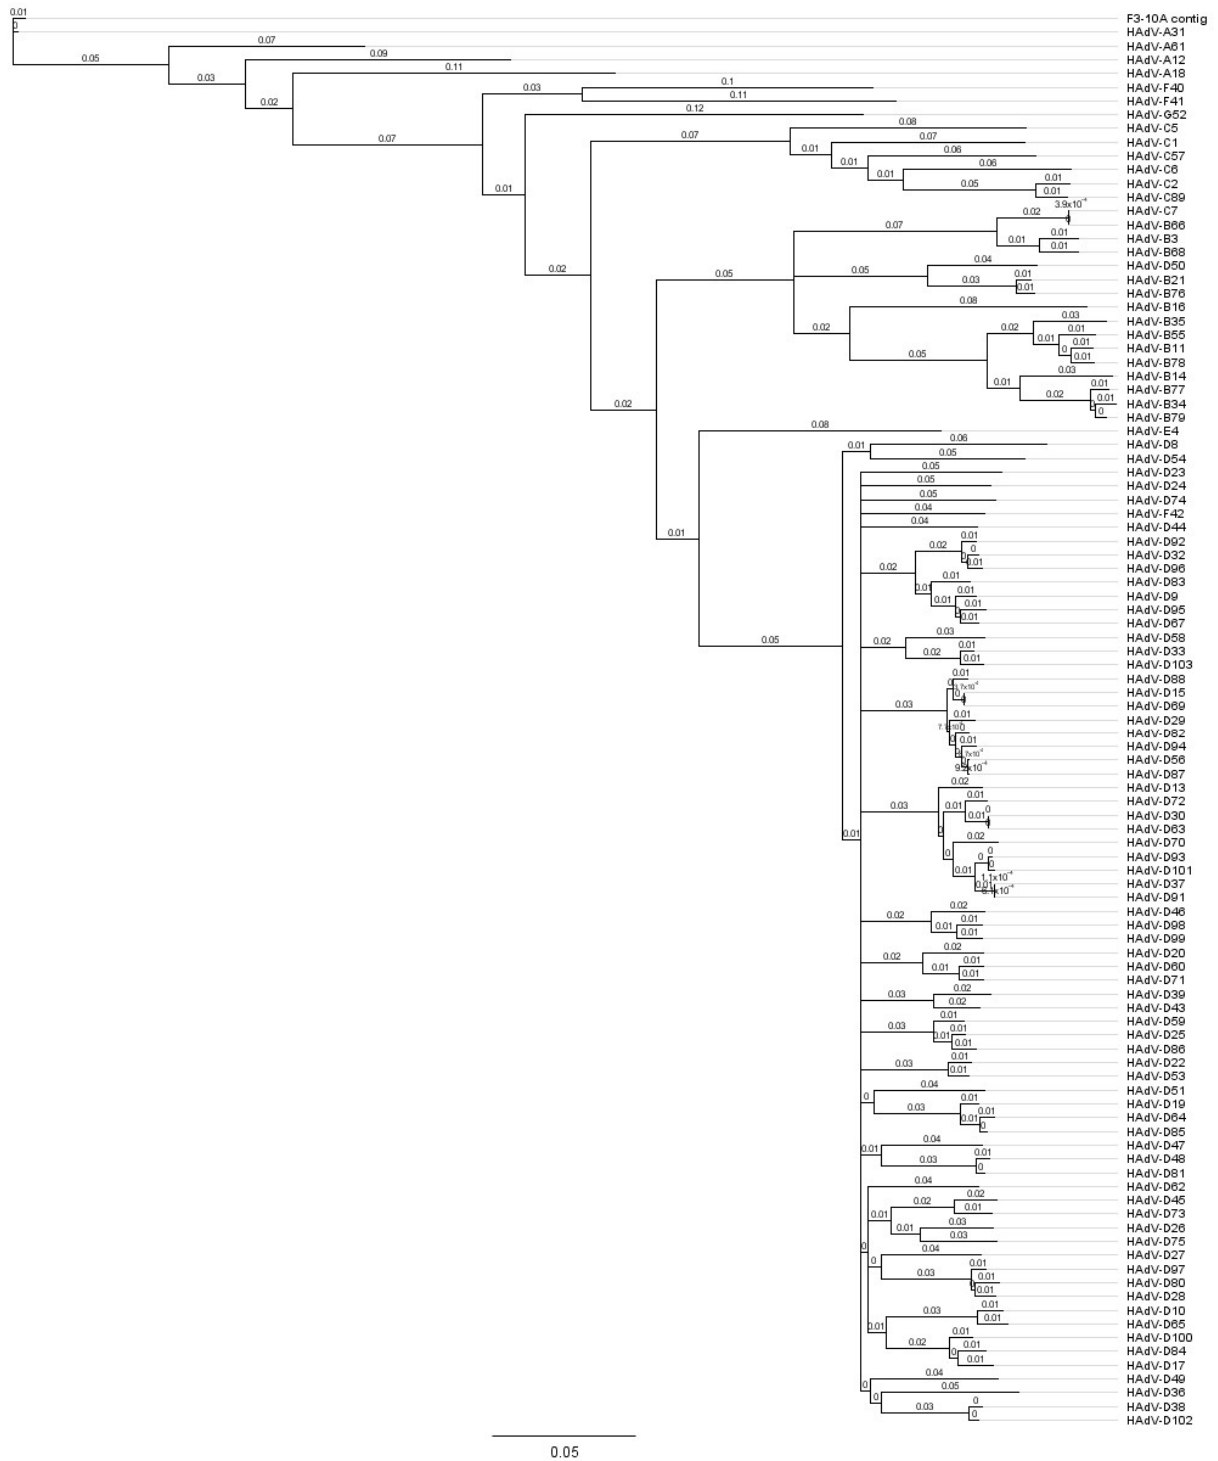

c)

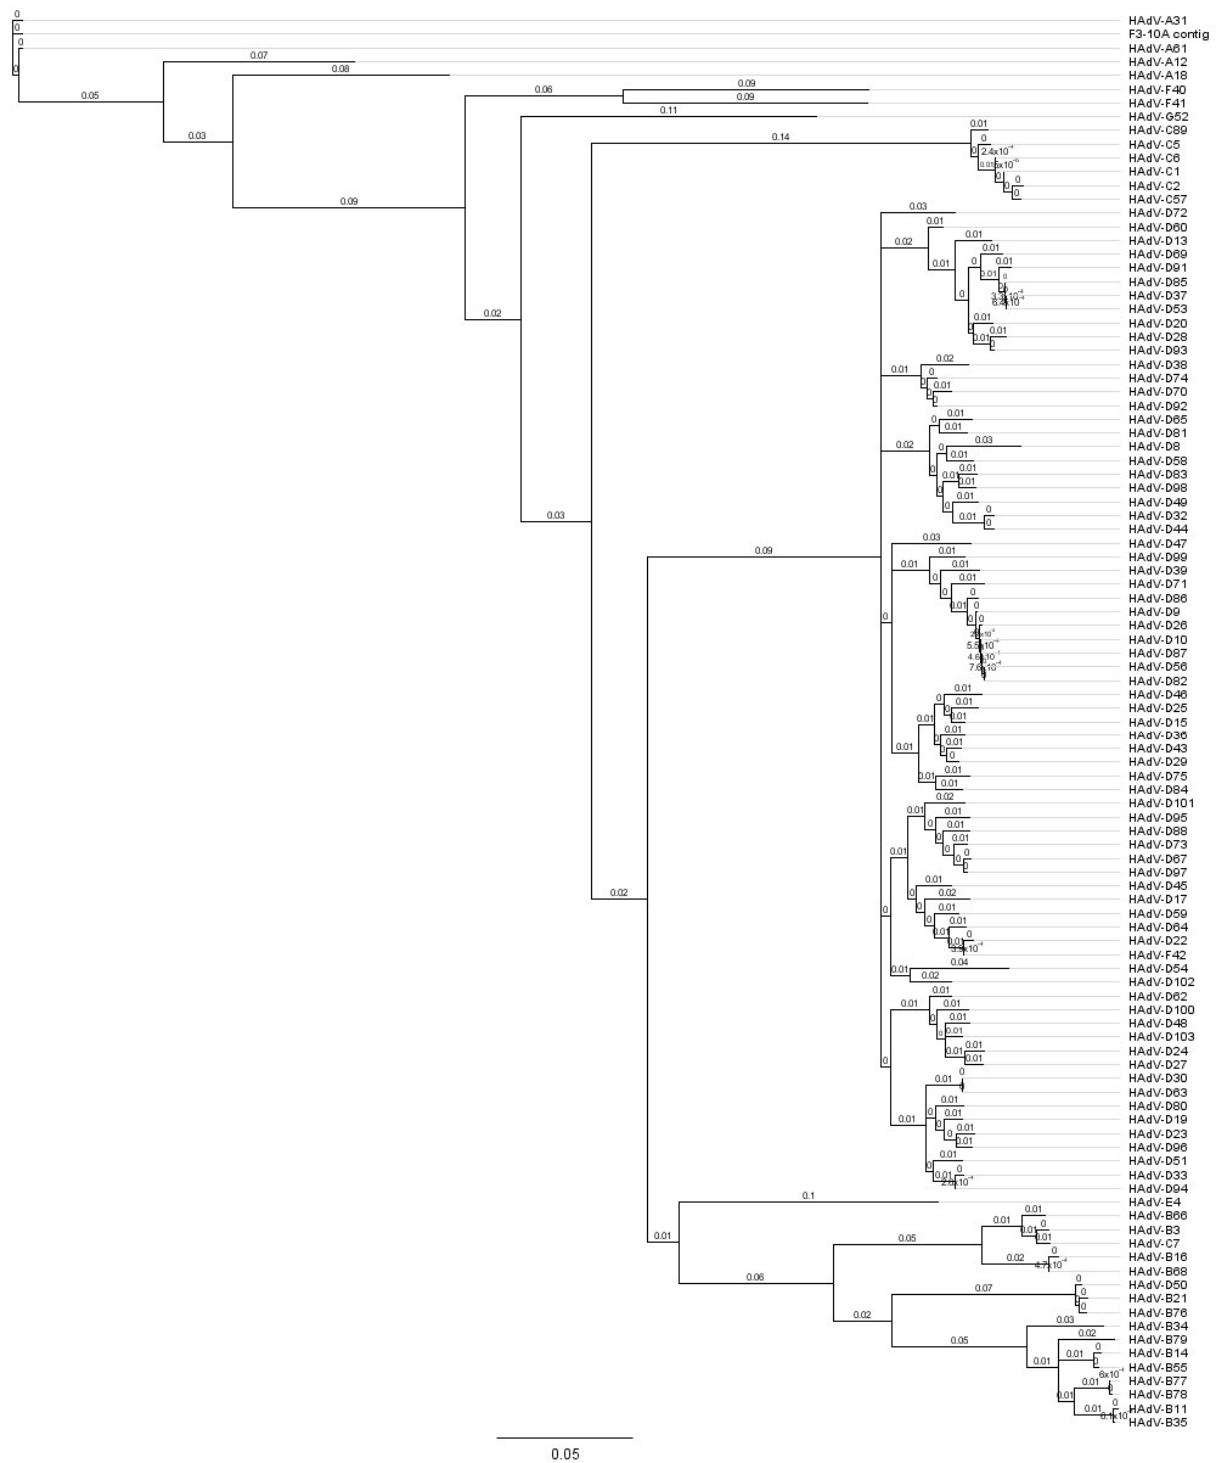



d)

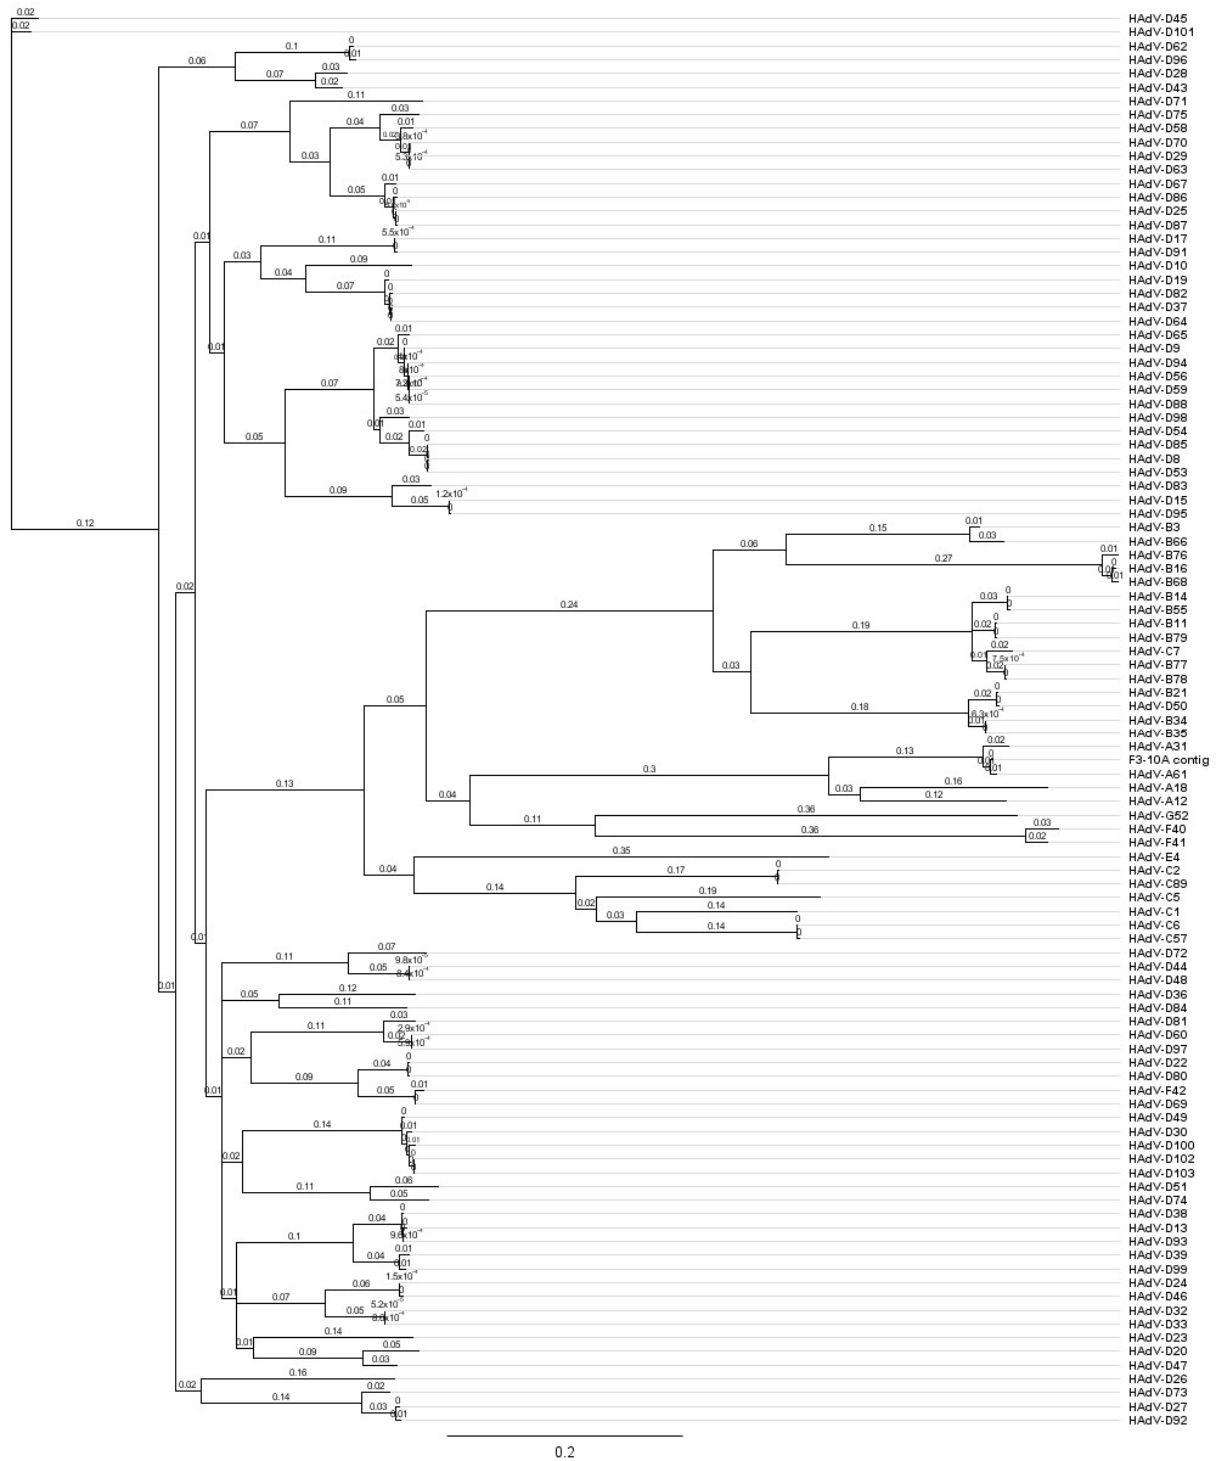

**Supplementary material 6.** Characterization of enterovirus (a) and rhinovirus (b) contigs detected in the gastroenteritis pools using the enterovirus typing tool by RIVM (v.0.1).

(a)

| Sample | Contig length | BLAST score | Genotype | VP1 Serotype, Sub-Genogroup | Classification                  |
|--------|---------------|-------------|----------|-----------------------------|---------------------------------|
| F1-3A  | 7,400         | 80.481865   | CV-A10   | CV-A10                      | Picornaviridae<br>Enterovirus A |
|        | 7,193         | 83.12013    | E-6      | E-6                         | Picornaviridae<br>Enterovirus B |
|        | 7,011         | 95.69187    | CV-A6    | CV-A6                       | Picornaviridae<br>Enterovirus A |
|        | 2,696         | 83.11688    | CV-B5    | CV-B5                       | Picornaviridae<br>Enterovirus B |
|        | 471           | 83.6518     | -        | -                           | Picornaviridae<br>Enterovirus B |
|        | 1,248         | 86.3124     | -        | -                           | Picornaviridae<br>Enterovirus B |
| F3-10  | 680           | 91.87592    | -        | -                           | Picornaviridae<br>Enterovirus B |
|        | 817           | 83.190186   | -        | -                           | Picornaviridae<br>Enterovirus B |
|        | 722           | 84.02778    | E-6      | E-6                         | Picornaviridae<br>Enterovirus B |
|        | 965           | 81.12033    | E-6      | E-6                         | Picornaviridae<br>Enterovirus B |
|        | 2,835         | 85.472496   | -        | -                           | Picornaviridae<br>Enterovirus B |
| S<1A   | 7,213         | 83.90564    | CV-B5    | CV-B5                       | Picornaviridae<br>Enterovirus B |
| S<1B   | 2,737         | 93.78882    | E-13     | E-13                        | Picornaviridae<br>Enterovirus B |
|        | 2,068         | 92.30769    |          |                             |                                 |
|        | 1,367         | 91.93899    |          |                             |                                 |
| S1-3A  | 6,865         | 80.99679    | E-9      | E-9                         | Picornaviridae<br>Enterovirus B |
|        | 7,085         | 85.63747    | E-3      | E-3                         | Picornaviridae<br>Enterovirus B |
|        | 6,650         | 89.35338    | CV-A6    | CV-A6                       | Picornaviridae<br>Enterovirus A |
|        | 6,902         | 80.17743    | CV-A10   | CV-A10                      | Picornaviridae<br>Enterovirus A |
|        | 2,608         | 93.66603    | E-13     | E-13                        | Picornaviridae<br>Enterovirus B |
|        | 365           | 90.95891    |          |                             | Picornaviridae<br>Enterovirus B |

|                       |       |           |        |              |                                 |
|-----------------------|-------|-----------|--------|--------------|---------------------------------|
|                       | 1,363 |           |        |              | Picornaviridae<br>Enterovirus B |
| S1-3B                 | 7,158 | 95.96199  | CV-A16 | CV-A16 , B1a | Picornaviridae<br>Enterovirus A |
|                       | 6,284 | 78.27817  | CV-B1  | CV-B1        | Picornaviridae<br>Enterovirus B |
|                       | 436   | 87.006966 | CV-A4  | CV-A4        | Picornaviridae<br>Enterovirus A |
|                       | 458   | 86.18421  | CV-A4  |              | Picornaviridae<br>Enterovirus A |
|                       | 1,105 | 85.791855 | CV-A4  | CV-A4        | Picornaviridae<br>Enterovirus A |
|                       | 2,122 | 83.577156 | CV-A8  |              | Picornaviridae<br>Enterovirus A |
|                       | 564   | 83.27402  | EV-A71 |              |                                 |
| S1-3C                 | 1,224 | 84.72222  | E-9    | E-9          | Picornaviridae<br>Enterovirus B |
|                       | 635   | 86.456696 |        |              | Picornaviridae<br>Enterovirus B |
|                       | 614   | 83.68679  |        |              | Picornaviridae<br>Enterovirus B |
|                       | 794   | 86.901764 |        |              | Picornaviridae<br>Enterovirus B |
| S1-3B<br>(unassigned) | 1,454 | 82.09366  | E-16   | E-16         | Picornaviridae<br>Enterovirus B |
|                       | 741   | 80.13514  | E-16   | E-16         | Picornaviridae<br>Enterovirus B |
|                       | 358   | 92.20056  | NTP    | NTP          | Picornaviridae<br>Enterovirus B |

(b)

| Sample | Contig length | BLAST score | Genotype | VP1 Serotype, Sub-Genogroup | Classification                 |
|--------|---------------|-------------|----------|-----------------------------|--------------------------------|
| F3     | 597           | 90.60403    | HRV-A60  |                             | Picornaviridae<br>Rhinovirus A |
|        | 483           | 90.47619    | HRV-A60  |                             | Picornaviridae<br>Rhinovirus A |
|        | 592           | 88.983055   | NTP      |                             | Picornaviridae<br>Rhinovirus A |
| S1     | 459           | 94.77124    | HRV-B52  |                             | Picornaviridae<br>Rhinovirus B |
|        | 574           | 91.78322    | HRV-B52  |                             | Picornaviridae<br>Rhinovirus B |
|        | 1,155         | 92.03463    | HRV-B52  |                             | Picornaviridae<br>Rhinovirus B |
|        | 766           | 92.81985    | HRV-B52  |                             | Picornaviridae<br>Rhinovirus B |
|        | 626           | 93.29073    | NTP      |                             | Picornaviridae<br>Rhinovirus B |
|        | 413           | 91.26214    | NTP      |                             | Picornaviridae<br>Rhinovirus B |
|        | 451           | 93.11111    | NTP      |                             | Picornaviridae<br>Rhinovirus B |
|        | 409           | 93.887535   | NTP      |                             | Picornaviridae<br>Rhinovirus B |
| S2     | 6,499         | 86.74773    | HRV-A78  |                             | Picornaviridae<br>Rhinovirus A |

**Supplementary material 7.** Characterization of non-enterovirus Picornaviridae contigs detected on the fecal pools analyzed, including parechovirus and cardiovirus.

| Pool  | Contig length | Classification | VP1 Genotype | % VP1 Identity | % VP1 Coverage | % Genome Identity | % Genome Coverage |
|-------|---------------|----------------|--------------|----------------|----------------|-------------------|-------------------|
| S<1B  | 7,248         | Parechovirus A | HPeV-1       | 87.8           | 100            | 87.8              | 98.5              |
| S1-3B | 796           | Parechovirus A | -            | -              | -              | 95.6              | 10.8              |
|       | 471           | Parechovirus A | -            | 92.0           | 7.1            | 95.8              | 6.4               |
|       | 1,695         | Parechovirus A | -            | -              | -              | 95.4              | 23.1              |
|       | 343           | Parechovirus A | -            | -              | -              | 95.0              | 4.7               |
|       | 6,949         | Parechovirus A | HPeV-6       | 95.4           | 100            | 95.9              | 94.6              |
| S3-10 | 7,942         | Cardiovirus B  | SAFV-2       | 94.7           | 100            | 90.7              | 98.7              |

**Supplementary material 8.** Phylogenetic trees of retrieved parechovirus contigs. Trees were constructed by using tree view software within Geneious (software version 11.0 (<https://www.geneious.com>) maximum-likelihood (Tamura-Nei model, Bootstrap of 1,000 replicates) analysis. Phylogenetic trees were constructed using the (a), full length of the VP1 genomic sequence (b), full human parechovirus complete genomes. The labels on the branch indicate the number of substitutions per site.

a.

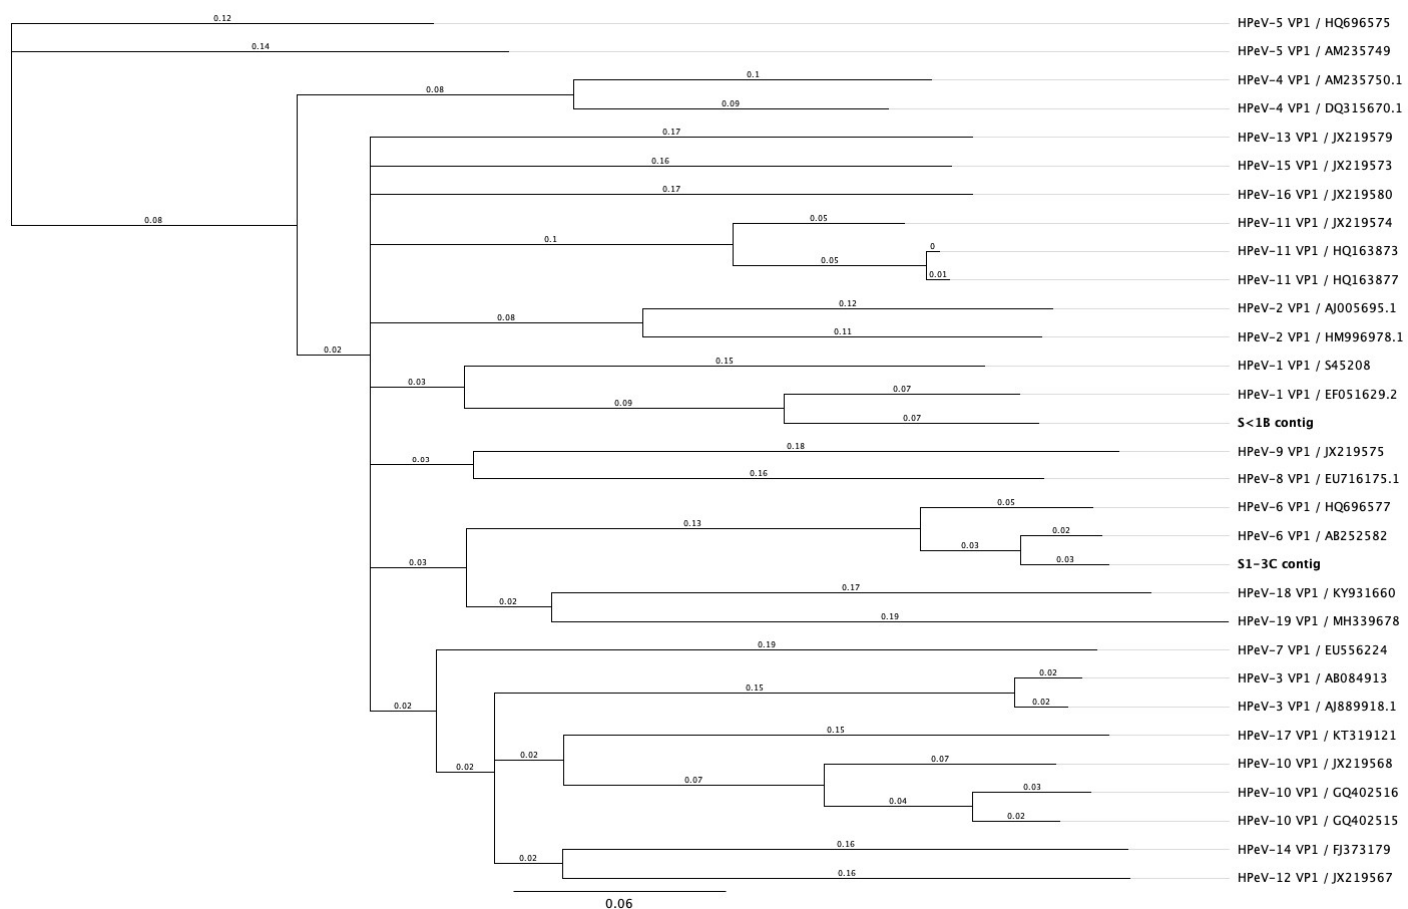

b.

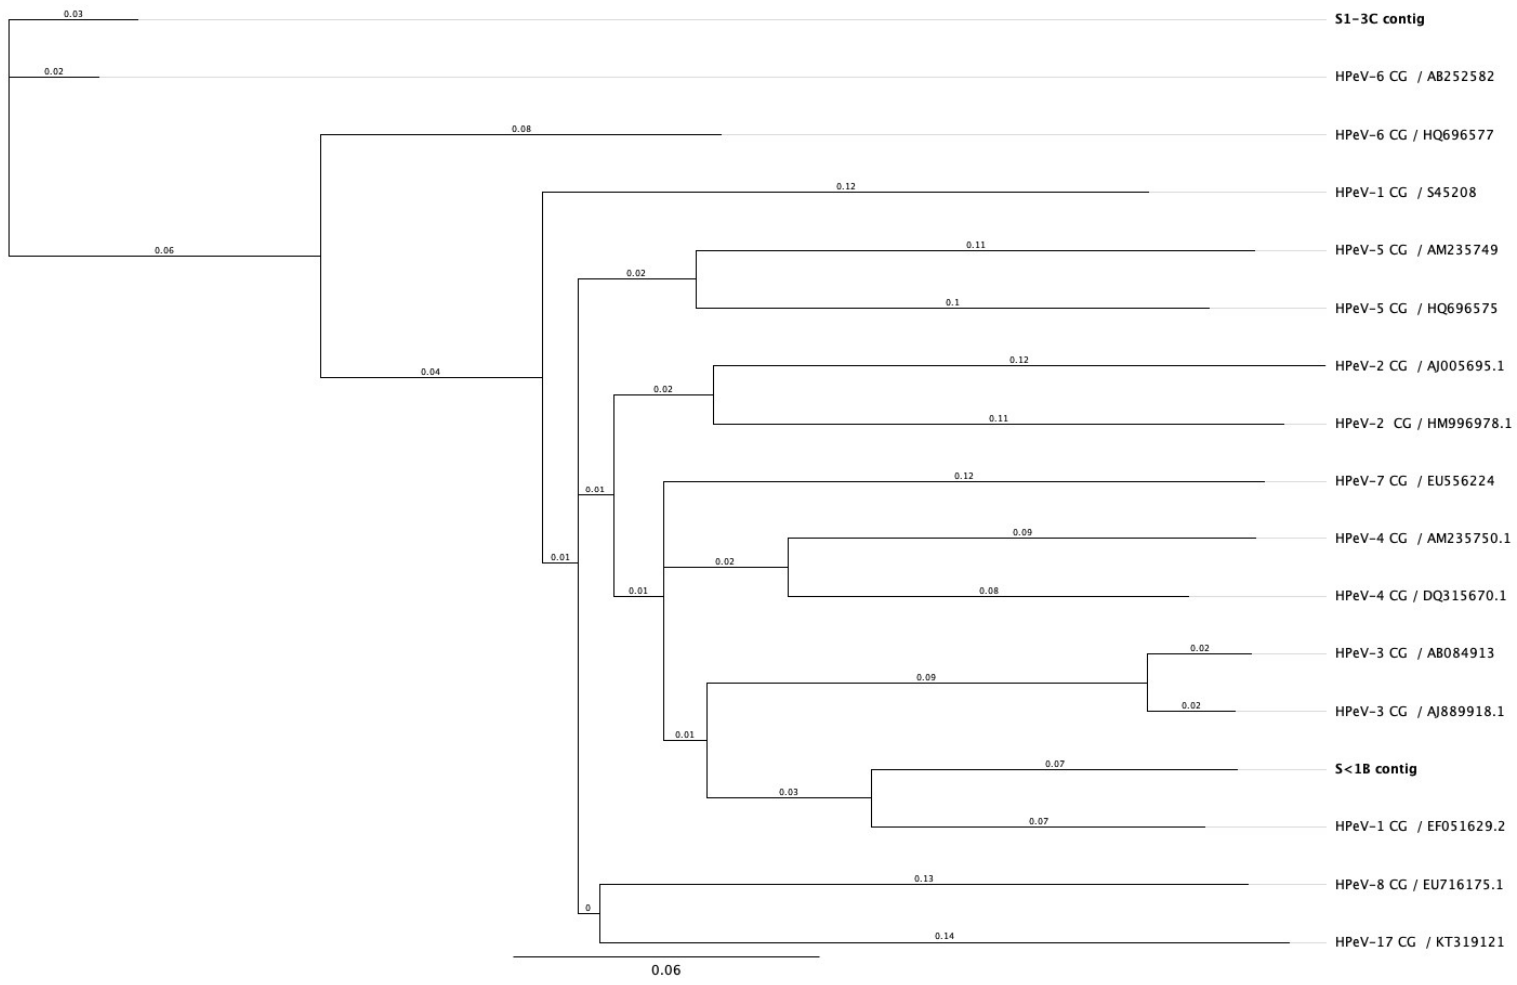

Supplement: s1 [file s1]
